# Supplementary material for: Association between Radiographic Parameters and Quality of Life in Adolescent Idiopathic Scoliosis: The Role of Sagittal Plane Alignment
Source: Research Square preprint supplement (doi:10.21203/rs.3.rs-6623263/v1), 2025-05-19
Supplement: Supplementary file 1 [file ef79806b15e843c4de70fa26.xlsx]

## Sheet: Sayfa1
hasta no	yaş	cinsiyet	öğrenim durumu	doğum şekli	doğum zamanı	annenin doğum yaşı	anne sütü alımı	ebeveynlerin evlilik durumu	gelir durumu	BMI(kg/m2)	tanı yaşı	mens yaşı	ilk fark eden kişi	kronik hastalık	ilaç kullanımı	cerrahi öyküsü	düzenli egzersiz	anne eğitim düzeyi	baba eğitim düzeyi	psikiyatrik H	SRS-AĞRI	SRS-İMAJ	SRS-FONKSİYON	SRS-RUH SAĞLIĞI	SRS-TOPLAM	CDI	WRGDÖ	VAS	EĞRİ PATERNİ	YERİ	TORAKAL APEX	LOMBER APEX	RİGO SINIFLAMASI	NASH MOE-T	NASH MOE-L	EKVS-T	EKVS-L	T-COBB	L-COBB	ATR-T	ATR-L	TRİRADİAT KATİLAJ	RİSSER	AVTRANS-T	AVTRANS-L	FD	SD	KİFOZ T2-12	KİFOZ T5-12
1	14	1	3	1	2	27	1	2	2	19.8	13	12	1	0	0	0	0	4	4	0	25	16	25	21	87	25	24	0	1	4	0	L3	E	0	2	0	5	0	21.5	3	3	1	4	0	30.78	-22.36	-52.2967	34.6	23.6
2	18	1	3	1	2	23	1	1	2	19.2	18	14	3	1	0	1	0	1	1	0	21	22	24	17	84	22	7	4	2	7	T8	L2	B	1	2	9	5	16.4	17.4	5	5	1	5	4.6	16.55	-15.63	-100.173	34.7	38.8
3	14	1	3	1	2	40	1	1	2	19.3	14	12.5	2	0	0	0	1	2	3	0	23	11	21	12	67	31	10	4	1	3	0	L2	E	0	1	0	5	0	11.4	0	5	1	2	0	3.23	-8.31667	-31.6133	34.7	18.6
4	18	1	3	1	2	20	1	1	2	20.2	17	13	3	0	0	0	0	0	1	2	12	15	21	8	56	24	14	8	1	3	0	L1	E	0	1	0	5	0	23	4	10	1	4	0	24.63	-17.8667	-37.3333	61.8	49.2
5	17	1	3	2	2	26	1	1	2	19.4	17	11	3	0	0	1	0	3	3	0	17	16	16	14	63	25	12	6	2	7	T6-7	L1-2	B	1	1	8	6	19.9	15.8	6	8	1	4	9.57	17.02	-9.58667	-91.4067	33.4	28.5
6	13	1	2	1	2	28	1	1	2	20.2	12	12	1	0	0	0	0	3	4	0	25	18	25	15	83	27	15	0	2	7	T9	L2	B	2	1	8	4	22.1	16.6	10	12	1	1	1.91	17.69	-19.4867	-70.4933	28.7	28.7
7	16	1	3	1	2	22	1	1	2	21	16	12	1	0	0	1	0	3	1	0	25	20	25	24	94	28	9	0	2	7	T8-9	L3	A	1	2	8	5	31.9	27.6	15	1	1	5	25.53	15.44	4.35667	-34.1433	30.6	18.7
8	18	1	3	2	2	39	1	1	2	21.6	13	10	1	0	0	0	0	1	3	0	18	18	23	13	72	31	12	6	1	1	T9	0	C	1	0	9	0	15.4	0	8	1	1	5	13.21	0	2.88667	-34.82	29.8	19.8
9	16	1	3	1	2	31	1	1	2	25.4	15	11	3	0	0	0	0	2	2	0	21	18	22	19	80	26	14	2	1	1	T8	0	C	1	0	8	0	15.3	0	7	5	0	2	13.11	0	-6.16333	-74.3167	46.2	38.9
10	10	1	2	2	1	32	0	1	2	16	10	10	1	0	0	0	1	3	3	0	25	20	24	23	92	27	10	0	1	6	0	T12-L1	E	0	2	0	5	0	21.7	3	5	1	1	12.07	49.19	-57.5467	-92.68	34.3	19.7
11	17	1	3	2	1	39	1	2	2	25.1	17	10	2	0	0	0	0	3	3	2	14	13	16	12	55	25	21	6	1	1	T9	0	A	2	0	10	0	22.9	0	10	5	1	3	38.73	0	19.1367	-83.9833	63.7	42.2
12	12	2	1	1	2	25	1	1	2	18.2	12	0	1	0	0	0	1	0	0	0	23	16	24	16	79	23	15	2	1	1	T8	0	C	1	0	7	0	12.4	0	3	1	0	1	8.36	0	-0.56	-62.98	39.7	29.8
13	17	2	3	1	2	22	1	1	1	22.5	16	0	1	0	0	0	0	1	2	0	24	12	25	19	80	28	13	2	2	8	T9	L2	B	1	2	9	5	13.5	18.8	5	2	1	5	3.72	21.41	2.89	-74.48	24.7	10.8
14	16	1	3	1	2	24	1	1	2	15	14	14	4	0	0	0	0	3	3	0	22	17	21	23	83	33	14	0	1	5	T12	0	E	0	2	0	8	0	24.8	2	5	1	3	0	37.4	6.86333	-7.28333	40.9	22.3
15	10	1	2	2	2	31	1	1	2	15.3	9	0	4	0	0	0	0	4	4	0	22	17	20	21	80	22	8	2	1	4	0	L2	E	0	2	0	5	0	23.3	1	2	0	1	0	16.56	-5.17333	-88.89	34.2	18.3
16	18	1	3	1	2	28	1	1	2	19.4	17	12	1	0	0	0	0	3	2	0	19	17	24	14	74	23	7	4	1	1	T9	0	A	1	0	10	0	14.6	0	5	2	1	5	18.58	0	-2.70333	-91.7167	20.8	18.7
17	13	2	2	2	2	30	1	1	2	17.3	6	0	1	0	0	0	0	2	3	0	23	19	24	24	90	27	11	2	1	6	0	T12-L1	E	0	3	0	8	0	24.5	2	10	1	1	0	35.63	-17.1833	-8.52333	23.3	14.4
18	14	1	2	2	2	31	1	1	2	20.4	10	13	1	0	0	0	0	3	3	0	22	17	25	17	81	22	11	4	2	7	T9-10	L2-3	A	2	1	8	4	25.6	19.7	13	4	1	2	21.64	6.13	-8.41667	-30.3033	36.5	23.6
19	16	1	3	1	2	24	0	1	2	16.2	15	13	3	0	0	0	1	1	3	0	17	19	21	14	71	29	13	4	1	6	0	T12-L1	E	0	2	0	5	0	25.7	2	11	1	4	0	30.07	-29.7667	-84.18	45.4	34.3
20	16	1	3	1	2	24	0	1	2	16.4	15	12	3	1	0	0	1	1	3	0	17	16	21	12	66	24	13	2	1	3	0	L2	E	0	2	0	6	0	23	1	10	1	4	0	14.92	4.03333	-46.1833	45.7	36.7
21	17	1	3	2	2	39	1	1	2	17.3	12	12	1	0	0	0	0	3	3	0	16	13	23	18	70	26	21	6	2	7	T8	L1	B	3	4	6	6	40.5	54.3	7	13	1	4	31.01	60.11	-47.59	-45.44	43.3	10.5
22	16	2	3	2	2	27	1	1	3	26.8	14	0	5	0	0	0	0	4	5	0	18	15	25	15	73	24	17	4	1	6	T10-11	0	A	2	0	8	0	45.2	0	10	0	1	4	39.07	0	-32.5467	-68.2967	35.4	14.6
23	16	2	3	1	2	33	1	1	2	17	15	0	1	0	0	0	1	3	3	0	18	13	20	11	62	29	13	6	1	4	0	L1-2	E	0	2	0	6	0	20.9	1	10	1	4	0	36.66	-16.9267	-12.64	46.4	26.5
24	14	1	3	1	2	30	1	1	2	21.3	14	12	1	0	0	0	0	3	1	0	20	10	20	15	65	23	13	2	1	3	0	L3	E	0	2	0	5	0	36.9	0	7	1	4	0	25.75	-14.9433	-33.2933	49.2	46.2
25	15	1	3	1	2	26	1	1	2	18.9	14	12	1	1	0	0	1	1	1	3	14	13	22	9	58	28	16	6	1	1	T8-9	0	A	3	0	9	0	28.2	0	13	3	1	2	34.28	0	20.56	-30.94	35	20.6
26	15	1	3	1	2	38	1	1	2	19.4	12	13	1	1	0	0	0	4	3	0	21	21	22	16	80	26	14	4	1	6	0	L1	E	0	3	0	7	0	34	8	3	1	3	0	54.76	-26.25	-80.74	37.8	18.9
27	13	2	3	1	2	30	1	1	2	18.8	13	0	3	0	0	0	0	2	3	0	25	21	25	25	96	24	13	0	1	4	0	L2	E	0	2	0	6	0	37	5	8	1	4	0	39.76	-24.5533	-19.6767	28.8	23.5
28	16	1	3	1	2	24	1	1	2	20.9	14	11	3	0	0	0	1	3	1	0	20	18	15	16	69	25	17	0	1	2	T9	0	C	1	0	7	0	18.7	0	4	0	1	4	9	0	13.2333	-40.6667	35.8	37.6
29	16	1	3	2	2	21	1	1	3	16.7	14	12	1	0	0	0	0	4	3	0	23	23	25	21	92	27	12	2	1	6	0	T12	E	0	2	0	8	0	26.3	5	7	1	4	0	45.7	-24.6067	-27.3567	40.9	26.7
30	14	1	3	2	2	37	1	1	2	18.3	15	12	1	0	0	0	0	3	3	0	17	16	24	18	75	22	22	4	2	7	T8	L2	B	1	1	8	4	16.8	19.1	8	4	1	4	12.49	7.26	2.41667	-74.9267	37.1	18.1
31	18	2	3	2	2	30	1	1	2	24	17	0	2	0	0	0	1	2	3	0	20	14	20	14	68	24	14	1	1	2	T9	0	C	1	0	9	0	12.7	0	4	0	1	5	10.14	0	4.22667	-39.1467	52	49.6
32	12	2	1	1	2	27	1	1	2	19.6	12	0	1	0	0	0	0	2	3	0	18	17	20	21	76	24	21	3	2	7	T7	L2	B	2	3	8	5	38.5	18.5	10	15	0	1	25.2	16.6	-18	17.8333	38.7	32.6
33	16	2	3	1	2	25	1	1	2	24.5	13	0	1	0	0	0	1	4	4	0	23	17	23	20	83	28	11	0	2	7	T8	L1	B	3	2	8	5	37.2	40.2	10	12	1	4	25.88	27.11	11.4867	-67.06	42.4	43
34	10	1	2	2	2	33	1	1	2	21.9	9	0	1	0	0	0	0	3	3	0	22	19	23	19	83	19	11	0	2	7	T7	L2	B	1	2	6	6	13.7	18.7	5	7	1	1	4.71	13.18	0.94	-71.01	25	16.3
[truncated: 1 more columns]
